# Supplementary material for: Genetic Parameters for Different Measures of Feed Efficiency and Their Relationship to Production Traits in Three Purebred Pigs
Source: MDPI journal article supplement (doi:10.3390/life11080830), 2021-08-13
Supplement: s1 [file s1]

**Table S1.** Number of litters and animals in the pedigree records of each purebred pig.

| Variable | Duroc  | Landrace | Yorkshire |
|----------|--------|----------|-----------|
| Litter   | 328    | 202      | 220       |
| Pedigree | 20,226 | 132,426  | 178,563   |
